# Supplementary material for: Enhanced VOC of two-dimensional Ruddlesden–Popper perovskite solar cells using binary synergetic organic spacer cations
Source: Royal Society of Chemistry journal article supplement (doi:10.1039/c9cp04018h), 2019-10-17
Supplement: c9cp04018h1.pdf [file c9cp04018h1.pdf]

## Enhanced $V_{OC}$ of two-dimensional Ruddlesden–Popper perovskite solar cells using binary synergetic organic spacer cations

*Juan Meng,<sup>ab</sup> Dandan Song,<sup>ab</sup> Di Huang,<sup>c</sup> Yang Li,<sup>ab</sup> Yaoyao Li,<sup>ab</sup> Ayman*

*Maqsood,<sup>ab</sup>, Suling Zhao,<sup>ab</sup> Bo Qiao,<sup>ab</sup> Haina Zhu,<sup>d</sup> Zheng Xu,<sup>\*ab</sup>*

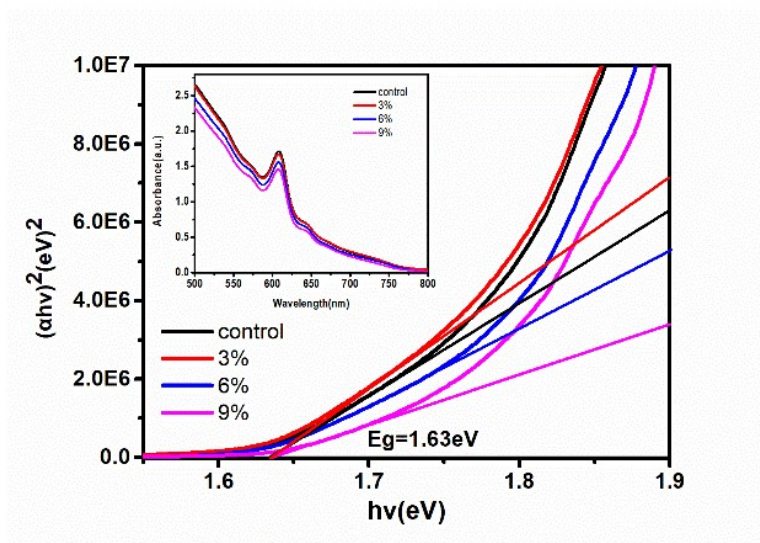

**Fig.S1.** The corresponding optical bandgaps by Tauc plot, and the inset is absorption spectra of the perovskite samples

**Table S1.** Parameters of the TRPL spectroscopy of control film and OA-modified (3%) film on the glass substrate. The excitation is from the substrate side. The average lifetime ( $\tau_{ave}$ ) is calculated using:  $\tau_{ave} = (A_1\tau_1^2 + A_2\tau_2^2)/(A_1\tau_1 + A_2\tau_2)$

| samples          | $\tau_1$ (ns) | $A_1$   | $\tau_2$ (ns) | $A_2$   |
|------------------|---------------|---------|---------------|---------|
| control film     | 12.69         | 9285.95 | 34.15         | 752.26  |
| OA-modified (3%) | 23.55         | 9310.17 | 71.45         | 1104.48 |

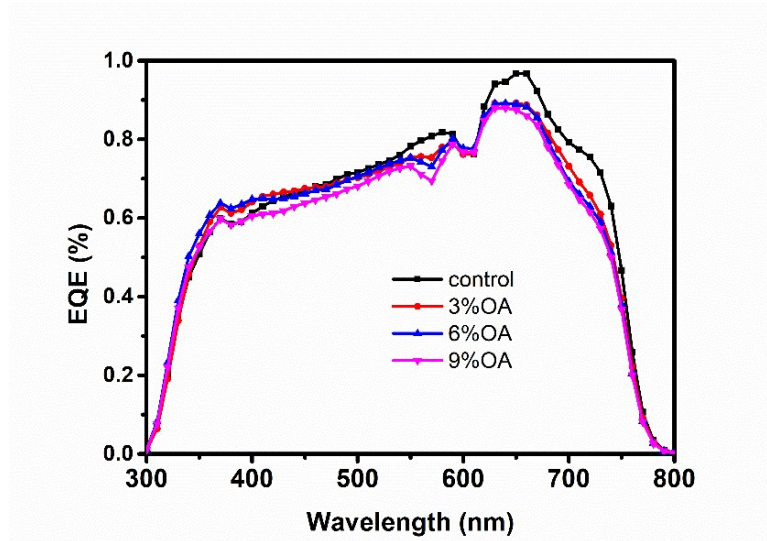

**Fig.S2.** EQE spectra of the PSCs with different molar ratio of OA cations

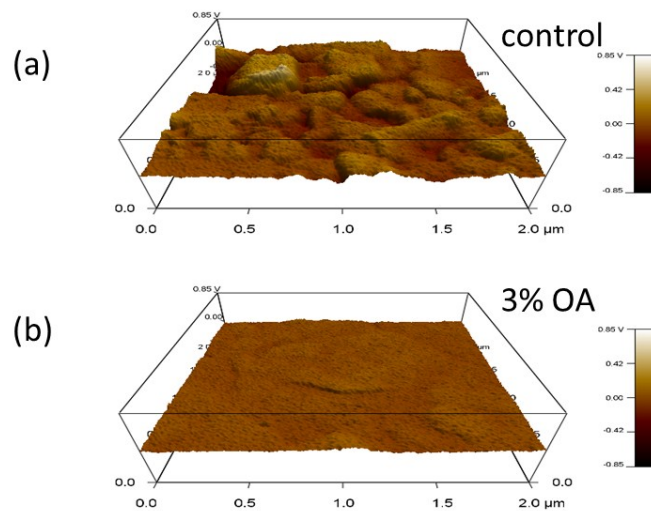

**Fig. S3.** The 3D images of surface potential from (a) control film, (b) 3% OA additive.

The 3D images of the surface potential are shown in **Fig. S1**. The control film exhibits intense surface potential fluctuations, which will generate more trap states at surface. Compare to the control film, the 2D RPP films with 3% OA additive show more uniform potential distribution across the surface, indicating that 3% OA additive can reduce the trap states at surface<sup>1</sup> and induces the surface passivation of the perovskite films.

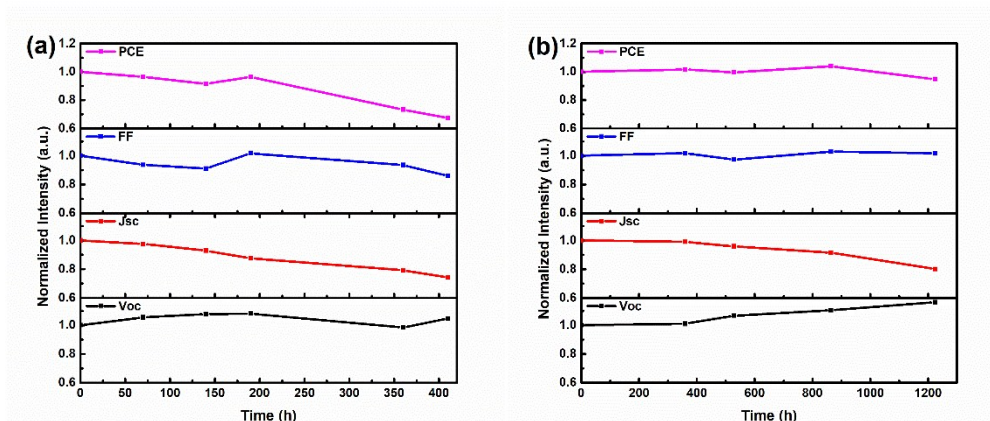

**Fig. S4.** The stability test of unsealed 2D RPPs based on  $(\text{BA})_2(\text{MA})_3\text{Pb}_4\text{I}_{13}$  perovskite film under (a) air atmosphere with humidity of  $30\% \pm 5\%$  and temperature of  $20^\circ\text{C} \pm 5^\circ\text{C}$ ; (b) N<sub>2</sub> glove box.

The stability of 2D RPPs based on 100% BA is shown in Fig. S3. The PSCs based on 100% BA remain 67% of its original PCE after keeping in air with humidity of  $30\% \pm 5\%$  and temperature of  $20^\circ\text{C} \pm 5^\circ\text{C}$  for 410 h. In condition of stored in N<sub>2</sub> glove box, the unencapsulated PSCs with 100% BA remain 94% of its original PCE

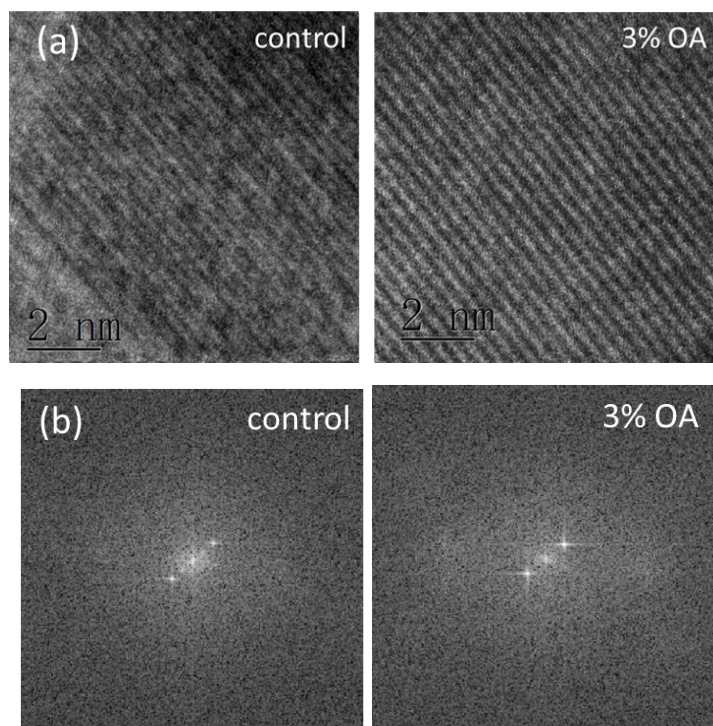

**Fig S5.** a) HRTEM images for control film and OA-modified (3%) film; b) images of fast Fourier transform (FFT) of the HRTEM images.

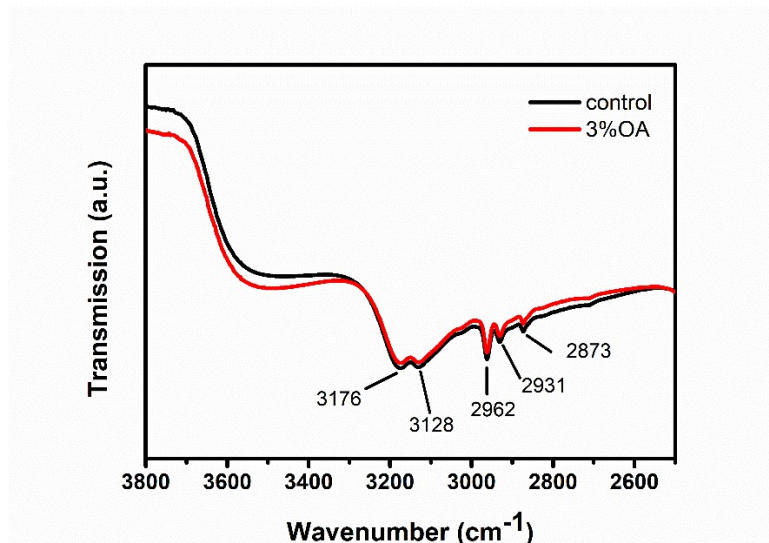

Fig S6. The FTIR of control film and OA-modified (3%) film.

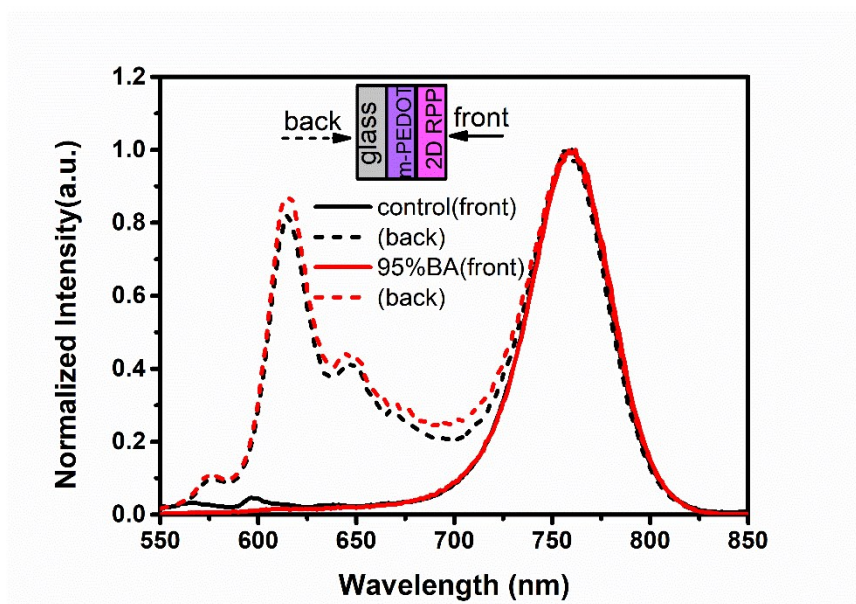

Fig. S7. The photoluminescence (PL) spectra of the control film and the film with 95% molar ratio BA cation. The excitation wavelength for PL was at 505 nm
